# Supplementary material
Source: Springer Nature journal article supplement (https://www.springermedizin.de/resource/supplementary/12913_2013_2892_MOESM2_ESM.pdf/9531808)

A.

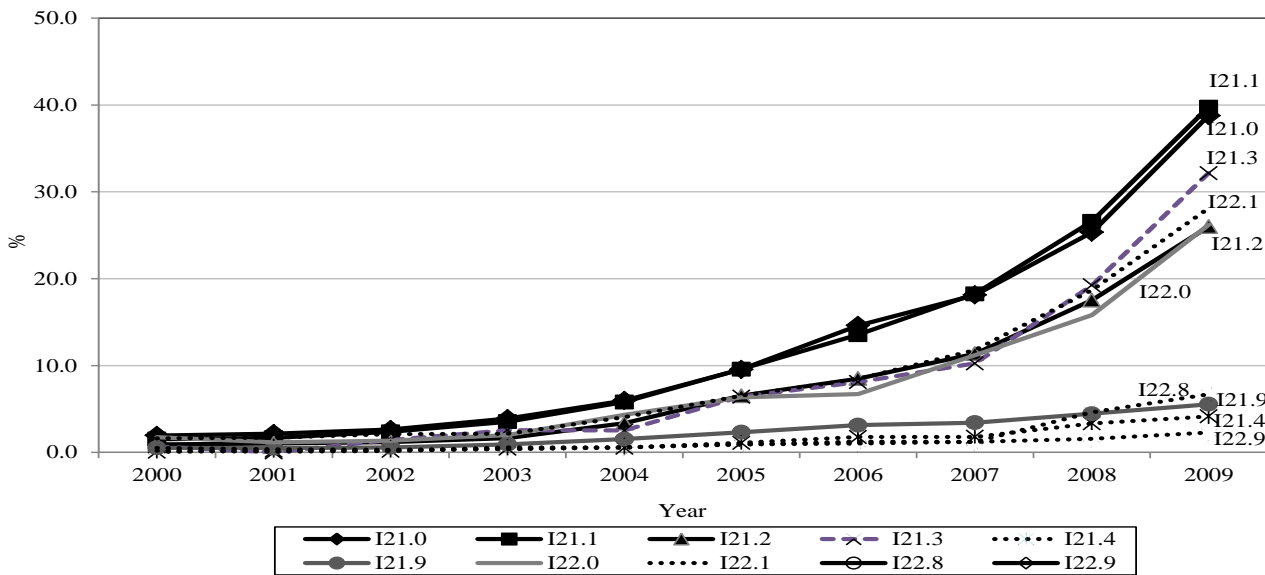

B.

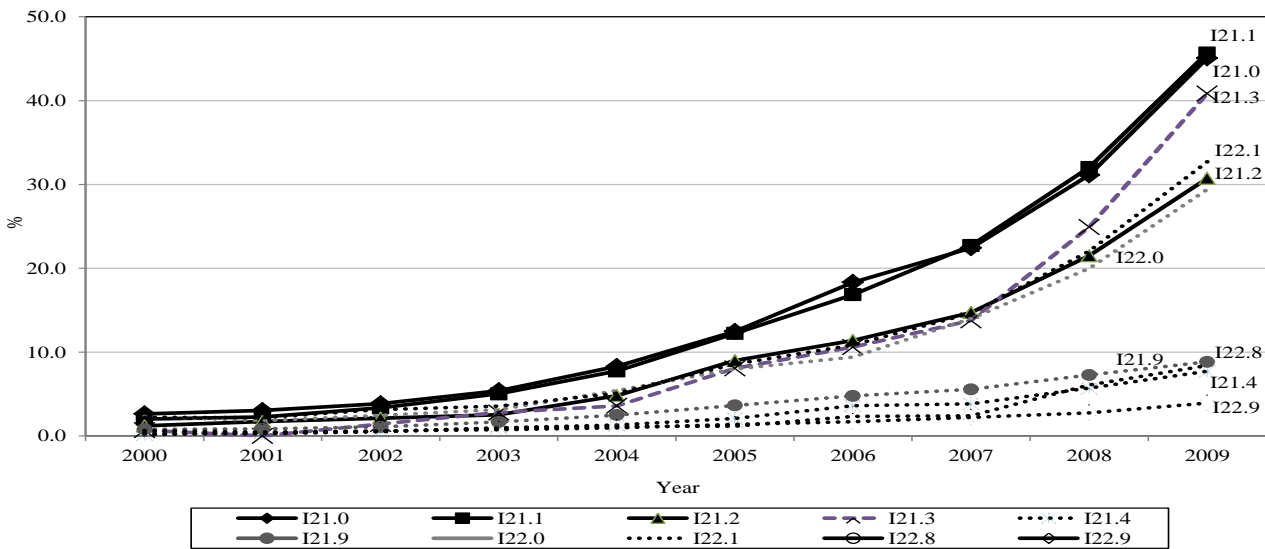

Supplement: MOESM2 [file 9531808]
